# Supplementary material for: Advances in Novel Animal Vitamin C Biosynthesis Pathways and the Role of Prokaryote-Based Inferences to Understand Their Origin
Source: MDPI journal article supplement (doi:10.3390/genes13101917), 2022-10-21
Supplement: s1 [file s1]

# **Advances in Novel Animal Vitamin C Biosynthesis Pathways and the Role of Prokaryote-Based Inferences to Understand Their Origin**

Pedro Duque, Cristina P. Vieira, Jorge Vieira

## **Supplementary Figures**

**Figure S1** – Complete AO dataset MUSCLE alignment file. The alignment presented was the one used to perform the phylogenetic analyses discussed in the manuscript. The relevant amino acid regions used to extrapolate putative AO functions are tagged at the top of the respective alignment positions, and delimited by the black colour background.

|                                                        | 1                    | 10              | 20             | 30        | 40              | 50    | 60                                    | 70                      | 80    | 90    |
|--------------------------------------------------------|----------------------|-----------------|----------------|-----------|-----------------|-------|---------------------------------------|-------------------------|-------|-------|
| <i>Mycobacterium tuberculosis</i> H37Rv NP_216287.1    | -----                | -----           | -----          | -----     | -----           | ----- | -----                                 | -----                   | ----- | ----- |
| <i>Streptomyces albiflaviniger</i> MBI0379321.1        | -----                | -----           | -----          | -----     | -----           | ----- | -----                                 | -----                   | ----- | MAV   |
| <i>Pseudomonas aeruginosa</i> PAO1 NP_254014.1         | -----                | -----           | -----          | -----     | -----           | ----- | -----                                 | -----                   | ----- | MVGNP |
| <i>Myxococcales bacterium</i> MCO4763851.1             | -----                | -----           | -----          | -----     | -----           | ----- | -----                                 | -----                   | ----- | ----- |
| <i>Bacteroidetes bacterium</i> MBS1617249.1            | -----                | -----           | -----          | -----     | -----           | ----- | -----                                 | -----                   | ----- | ----- |
| <i>Flavobacteriales bacterium</i> HIA12326.1           | -----                | -----           | -----          | -----     | -----           | ----- | -----                                 | -----                   | ----- | ----- |
| <i>Moorena</i> sp. SI04G3 NE081287.1                   | -----                | -----           | -----          | -----     | -----           | ----- | -----                                 | -----                   | ----- | ----- |
| <i>Calothrix parasitica</i> NIES 267 BAY85903.1        | -----                | -----           | -----          | -----     | -----           | ----- | -----                                 | -----                   | ----- | ----- |
| <i>Asgard group archaeon</i> MCP8715902.1              | -----                | -----           | -----          | -----     | -----           | ----- | -----                                 | -----                   | ----- | ----- |
| <i>Halobacteriales archaeon</i> PSP48796.1             | -----                | -----           | -----          | -----     | -----           | ----- | -----                                 | -----                   | ----- | ----- |
| <i>Euglena gracilis</i> BA094255.2                     | MARNKVMRMLF-----     | -----           | RAVA-----      | -----     | -----           | ----- | -----                                 | PTTAGICLWQVCNQFSS-----  | ----- | VEVWC |
| <i>Trypanosoma brucei brucei</i> TREU927 XP_844937.1   | -----                | -----           | -----          | -----     | -----           | ----- | -----                                 | -----                   | ----- | M     |
| <i>Leishmania major strain Friedlin</i> XP_001682394.1 | -----                | -----           | -----          | -----     | -----           | ----- | -----                                 | -----                   | ----- | M     |
| <i>Mus musculus</i> NP_848862.1                        | -----                | -----           | -----          | -----     | -----           | ----- | -----                                 | -----                   | ----- | ----- |
| <i>Rattus norvegicus</i> EDL85374.1                    | -----                | -----           | -----          | -----     | -----           | ----- | -----                                 | -----                   | ----- | ----- |
| <i>Xenopus laevis</i> OCT81467.1                       | -----                | -----           | -----          | -----     | -----           | ----- | -----                                 | -----                   | ----- | ----- |
| <i>Ciona intestinalis</i> XP_002122023.1               | -----                | -----           | -----          | -----     | -----           | ----- | -----                                 | -----                   | ----- | MTS   |
| <i>Falco cherrug</i> XP_005443605.1                    | -----                | MGPAKGGAAD----- | -----          | TPGR----- | -----           | ----- | -----                                 | ALSASLEKFGQGAKVSLW----- | ----- | LEAEA |
| <i>Rosa chinensis</i> XP_024182616.1                   | MQRALTVKRSL-QSL----- | -----           | QRIANSTTK----- | -----     | NPLSSGRAFC----- | ----- | NAPSPSPSPAPSSASSASASASEVRKYMGYTA----- | -----                   | ----- | LVLFC |
| <i>Rosa chinensis</i> XP_024165881.1                   | -----                | -----           | -----          | -----     | -----           | ----- | -----                                 | MYRSWWLLGAIH-----       | ----- | LLVS  |
| <i>Prunus mume</i> XP_008240731.1                      | -----                | -----           | -----          | -----     | -----           | ----- | -----                                 | SSASELRKYLGTYA-----     | ----- | LVLFS |
| <i>Prunus mume</i> XP_008220057.1                      | -----                | -----           | -----          | -----     | -----           | ----- | -----                                 | -----                   | ----- | ----- |
| <i>Fragaria vesca subsp vesca</i> XP_004291192.1       | -----                | -----           | -----          | -----     | -----           | ----- | -----                                 | -----                   | ----- | ----- |
| <i>Fragaria vesca subsp vesca</i> XP_004303609.1       | -----                | -----           | -----          | -----     | -----           | ----- | -----                                 | -----                   | ----- | ----- |
| <i>Arabidopsis thaliana</i> NP_190376.1                | -----                | -----           | -----          | -----     | -----           | ----- | -----                                 | -----                   | ----- | ----- |
| <i>Arabidopsis thaliana</i> NP_182199.1                | -----                | -----           | -----          | -----     | -----           | ----- | -----                                 | -----                   | ----- | ----- |
| <i>Arabidopsis thaliana</i> NP_564393.1                | -----                | -----           | -----          | -----     | -----           | ----- | -----                                 | -----                   | ----- | ----- |
| <i>Arabidopsis thaliana</i> NP_182198.2                | -----                | -----           | -----          | -----     | -----           | ----- | -----                                 | -----                   | ----- | ----- |
| <i>Arabidopsis thaliana</i> NP_182197.1                | -----                | -----           | -----          | -----     | -----           | ----- | -----                                 | -----                   | ----- | ----- |
| <i>Arabidopsis thaliana</i> NP_200460.1                | -----                | -----           | -----          | -----     | -----           | ----- | -----                                 | -----                   | ----- | ----- |
| <i>Quercus suber</i> XP_023896433.1                    | -----                | -----           | -----          | -----     | -----           | ----- | -----                                 | -----                   | ----- | ----- |
| <i>Quercus suber</i> XP_023896434.1                    | -----                | -----           | -----          | -----     | -----           | ----- | -----                                 | -----                   | ----- | ----- |
| <i>Quercus suber</i> XP_023900169.1                    | -----                | -----           | -----          | -----     | -----           | ----- | -----                                 | -----                   | ----- | ----- |
| <i>Quercus suber</i> XP_023914113.1                    | -----                | -----           | -----          | -----     | -----           | ----- | -----                                 | -----                   | ----- | ----- |
| <i>Aspergillus chevalieri</i> XP_043131130.1           | -----                | -----           | -----          | -----     | -----           | ----- | -----                                 | -----                   | ----- | ----- |
| <i>Candida dubliniensis</i> CD36 XP_002422445.1        | -----                | -----           | -----          | -----     | -----           | ----- | -----                                 | -----                   | ----- | ----- |
| <i>Saccharomyces cerevisiae</i> S288C NP_013624.1      | -----                | -----           | -----          | -----     | -----           | ----- | -----                                 | -----                   | ----- | ----- |
| <i>Thermothielavioides terrestris</i> XP_003651626.1   | -----                | -----           | -----          | -----     | -----           | ----- | -----                                 | -----                   | ----- | M     |
| <i>Colletotrichum lupini</i> XP_049145240.1            | -----                | -----           | -----          | -----     | -----           | ----- | -----                                 | -----                   | ----- | ----- |
| <i>Homo sapiens</i> DHCR24 NP_055577.1                 | -----                | -----           | -----          | -----     | -----           | ----- | -----                                 | -----                   | ----- | ----- |
| <i>Bombyx mori</i> DHCR24 XP_004926865.1               | -----                | -----           | -----          | -----     | -----           | ----- | -----                                 | -----                   | ----- | ----- |

**FAD-Binding motif**  
**(X[GR]X[GS][HLK][SG]) region**

|                | 91                | 100              | 110       | 120       | 130       | 140                  | 150        | 160         | 170       | 180       | 190       | 200        | 210      | 215                 |
|----------------|-------------------|------------------|-----------|-----------|-----------|----------------------|------------|-------------|-----------|-----------|-----------|------------|----------|---------------------|
| NP_216287.1    | -----             | MSPI-----        | -----     | WSNW----- | -----     | PGEQVCA-PSAIVRPTSEAE | LADVIAQA   | AKRGERVRAV  | VGSGHST   | FTDI-AC   | TD-----   | GVMIDMTGLQ | RVLDVDQ  | -----               |
| MBI0379321.1   | RTVKTVRSSV-----   | -----            | -----     | WRNW----- | -----     | AGNVMAR-PT           | TRIVAPSTQ  | ELAEVRRATAE | GLKVAVGT  | -GHSFT    | TA-AATD   | -----      | GLLI     | IRPDRMAGVRGLDR----- |
| NP_254014.1    | ALAELLRAPLIP----- | -----            | -----     | WRNW----- | -----     | SGAQSC               | L-PLAREAPK | LDLDELVI    | IRQA----- | -----     | SGRIRPVGS | -GHSF      | SAL-VPTD | -----               |
| MC04763851.1   | -----             | MSQS-----        | -----     | IANW----- | -----     | SRTHHCT-PA           | RLERPRSE   | EDTIALVKNA  | ADNGD     | TIRVIGA   | -LHSNS    | DC-AMSD    | -----    | GIVVSLDDMQVLEVD     |
| MBS1617249.1   | -MAIISQRAYR-----  | -----            | -----     | FRNW----- | -----     | AGNQCT-PS            | HYQPTEAE   | LIEVI-----  | -----     | KTHSKVRM  | VGT-GHS   | WSAL-CH    | TD-----  | EALINLDKYNR         |
| HIA12326.1     | -----             | MNAPHK-----      | -----     | FVNW----- | -----     | AATESN-PE            | KFLKPSNQ   | EELVE       | INSAINANS | KIRVVG    | A-GHS     | WSSV-AC    | TD-----  | HWLITLDNYCNVLS      |
| NEO81287.1     | -----             | MNQNK-----       | -----     | FINW----- | -----     | SQQYCT-PT            | SVHPASTE   | EARDIVC     | VMQQGT    | KIRVFGS   | -GHS      | PSDI-AM    | SN-----  | QDLVCS              |
| BAY85903.1     | -----             | MNQEJ-----       | -----     | FINW----- | -----     | SGEYRCT-PS           | KVHHPR     | TDVREIV     | CQAIKRGS  | KIRVFGS   | -GHS      | PSDI-AM    | SD-----  | EELVCLDGLNTIKD      |
| MCP8715902.1   | MSSGIPESLKPF      | LT               | TKLV----- | -----     | HS        | TW-----              | AGTF       | LCK-PQAIF   | QPRNEKE   | IKE       | LINQAR    | INGKT      | IMT      | VGS-GHSP            |
| PSP48796.1     | -----             | MLRLTDGV-----    | -----     | -----     | -----     | WENW-----            | -----      | SGSVRAR-PTH | VHPETE    | ATLRD     | VERA----- | -----      | DDTL     | LRVAGA-GHSP         |
| BA094255.2     | -----             | RSLP-----        | -----     | -----     | -----     | VS                   | NW-----    | SSTHSVV-AG  | KYYQP     | TEVEEL    | KD        | IVTIC      | HATG     | QKIRPAGA-MLSP       |
| XP_844937.1    | -----             | QGETMSDGT-----   | -----     | -----     | -----     | WTNF-----            | -----      | ANIGKCF-PR  | KHHYP     | NTVEE     | VSSI      | KVINS      | AGERC    | RVVGG-GKSP          |
| XP_001682394.1 | -----             | MSAHSAAAR-----   | -----     | -----     | -----     | WTNL-----            | -----      | AGIGSCH-PR  | HHPYT     | STKEV     | QDAVEL    | VRSQNG     | KCRV     | AGA-GKSP            |
| NP_848862.1    | -----             | MVHGKGVQ-----    | -----     | -----     | -----     | FQNW-----            | -----      | AKTYGCS-PE  | MYQPTS    | VGVE      | REV       | LALAR      | QNK      | KVKVVG-GHSP         |
| EDL85374.1     | -----             | MVHGKGVQ-----    | -----     | -----     | -----     | FQNW-----            | -----      | AKTYGCS-PE  | VYQPTS    | VGVE      | REV       | LALAR      | QNK      | KVKVVG-GHSP         |
| NP_1821467.1   | -----             | MVLGRGGYK-----   | -----     | -----     | -----     | FENW-----            | -----      | AQTYGSS-PE  | LYFQPT    | CVEI      | KE        | ILDLAR     | QSRK     | RVKVVVG-GHSP        |
| XP_002122023.1 | -----             | FDISQKGSGYR----- | -----     | -----     | -----     | FYNW-----            | -----      | SKTYSAS-PE  | LYFEP     | SRDNL     | ILSRA     | KENK       | TKV      | KVVG-GLS            |
| XP_005443605.1 | -----             | ITEVHQGGVK-----  | -----     | -----     | -----     | FQNW-----            | -----      | AKTYGSS-PE  | LYFQPTS   | VEE       | IRE       | ILDMAR     | QDKR     | RVKVVVG-GHSP        |
| XP_024182616.1 | GAATYYSF          | FPF              | PENAKH    | KAQIFRYAP | LPEEL     | LHTVSNW              | -----      | SGTHEVQ-TR  | VFHQP     | PETLEE    | L         | EKKV       | KEAN     | ENKYRIRPVGS         |
| XP_024165881.1 | VTAMLQSP          | IQCD-GT          | GGCNLFNS  | -----     | -----     | YGVW-----            | -----      | NDRKNCH-V   | PNVTYPT   | PTENEL    | LRAVAYAN  | QNK        | LKL      | RVVVSQFSHT          |
| XP_008240731.1 | AAATYYSF          | FPF              | PENAKH    | KAQIFRYAP | LPEEL     | LHTVSNW              | -----      | SGTHEVQ-TR  | VFHQP     | PETLEE    | L         | EKKV       | KEAN     | ENKYRIRPVGS         |
| XP_008220057.1 | IQAMPPEL          | PVRCN-K          | NGCNLYNS  | -----     | -----     | YGVW-----            | -----      | GDRKDCH-V   | QNVTYPT   | TEEBEL    | LRAVAYAN  | QNK        | LKL      | RVVVSQFSHT          |
| XP_004291192.1 | VAAMLQSP          | VQCD-GT          | GGCNLFNS  | -----     | -----     | YGIW-----            | -----      | NDRKDCY-V   | LNVTYPT   | TENEL     | LKAVAYAN  | QNK        | FKL      | KVVSQFSHT           |
| XP_004303609.1 | GAATYYSF          | FPF              | PENAKH    | KAQIFRYAP | LPEEL     | LHTVSNW              | -----      | SGTHEVQ-TR  | VFHQP     | PETLEE    | L         | EKKV       | KEAN     | ENKYRIRPVGS         |
| NP_190376.1    | GVATYFS           | FPF              | PENAKH    | KAQIFRYAP | LPEL      | LHTVSNW              | -----      | SGTHEVQ-TR  | NFNQ      | PENLAD    | EALVK     | ESHEK      | L        | KLIRPVGS            |
| NP_182199.1    | TISTPPED          | VPKCVSG          | NTNCTV    | TNS-----  | -----     | YGAF-----            | -----      | PDRSTCR-A   | ANVAYPT   | TEAE      | LVSIV     | VAAATK     | AGR      | KMRVTRYSHS          |
| NP_564393.1    | ASSTPPDD          | VPKCESG          | NMCTV     | TNS-----  | -----     | YGAF-----            | -----      | PDRSTCE-A   | AKVEY     | PKTEAE    | LVSIV     | VAAATK     | AGR      | KMRVTRYSHS          |
| NP_182198.2    | AVSTPPDD          | VPKCVSG          | NTNCTV    | TNS-----  | -----     | YGAF-----            | -----      | PDRSTCR-A   | ANVAYPT   | TEAE      | LVSIV     | VAAATK     | AGR      | KMRVTRYSHS          |
| NP_182197.1    | VISTPPED          | VPKCVSG          | NTNCTV    | TNS-----  | -----     | LGAF-----            | -----      | PDRSTCR-A   | ANVAYPT   | TEAE      | LVSIV     | VAAATK     | AGR      | KMRVTRYSHS          |
| NP_200460.1    | ASSP              | PPDD             | VPNCE     | FGTMC     | TV        | TNS-----             | -----      | YGAF-----   | -----     | PDRSTCR-A | AEVAYPT   | TEAE       | LVSIV    | VAAATK              |
| XP_023896433.1 | VRCSPPED          | HIKCSS           | KNTDCT    | ITNS----- | -----     | YGVF-----            | -----      | PDRSTCR-A   | AEVAYPT   | TEAE      | LVSIV     | VAAATK     | AGR      | KMRVTRYSHS          |
| XP_023896434.1 | VCCIPPED          | PIKCSS           | DNTDCT    | ITNS----- | -----     | YGAF-----            | -----      | PDRSTCR-A   | EVAFP     | STEQE     | LISIV     | SKAS       | RNKR     | KMKVTRYSHS          |
| XP_023900169.1 | GVATYYSF          | FPF              | PENAKH    | KAQIFRYAP | L         | PDDLHTVSNW           | -----      | SGTHEVQ-TR  | VFHQP     | PENLQ     | QLENNV    | KEAH       | KA       | TRIRPVGS            |
| XP_023914113.1 | IYAMPQ            | SPVQCS-TT        | GGCTLYNS  | -----     | -----     | YGVW-----            | -----      | GDRKDCH-A   | PNVTYPT   | TEEQE     | LSRV      | VAYAN      | QNK      | LKLKVVTKFSHT        |
| XP_043131130.1 | LLHAV             | SSAYR-----       | -----     | -----     | -----     | WFNW-----            | -----      | QFEVTCE-S   | DAYI      | APED      | ESAAS     | FLKQ       | DYARG    | SLIKVGN-GHGF        |
| XP_002422445.1 | -MADIPES          | LKPFV            | TNKL      | I-----    | -----     | HS                   | TW-----    | AGTF        | LCK-PQAIF | QPRN      | VEEIQ     | ELIK       | QARL     | HKKTIMTVGS          |
| NP_013624.1    | MSTIP             | FRKNYV-----      | -----     | -----     | -----     | FKNW-----            | -----      | AGIYSAK-P   | ERYFQ     | PSSIDE    | VVELV     | KSAR       | LAEK     | SIVTVGS             |
| XP_003651626.1 | ASPIPE            | LPPE-----        | -----     | -----     | -----     | LASL-----            | -----      | PAE-----    | -----     | PESVAE    | VEH       | AVT        | LAR      | QRRRLVTVGS          |
| XP_049145240.1 | ---MPSL           | RPLPL            | AMLL      | ASTAV     | TAAP----- | -----                | -----      | YNTFDG      | PGFP      | PACND     | VAAVHN    | ATS        | VS       | DIQSLVKDAIASGK      |
| NP_055577.1    | L                 | FL               | LPLSL     | IFDI      | YYY-----  | -----                | -----      | VRAW-----   | -----     | VVE       | KLSS-AP   | RLHEQ      | -VRD     | IQKQVREWKQGS        |
| XP_004926865.1 | L                 | ALLP             | SA        | AWKL      | SI-----   | -----                | -----      | IRNY-----   | -----     | VVE       | FMNS-AP   | KMHDDK     | -VKE     | VRQRIKEWLSGDKS      |

NP\_216287.1 -----PTGLVTVEGGAKLRALGPQ--LAQRRLGLENGQVDPSQISGTA-TATATHGTGVRF-G-NLSAIRSVRLRLVTAGG-----EVLSSLSEGGD-----YLAARVSLGALGVISQVTLTQVTFPLL  
 MBT0379321.1 -----EAGTVTVAAAGTSRLQLNET--LSAHSLSLNVMDIMEQTAVAGA-TSTGTHGTGRDS-A-SIAAQIKGLELVTADG-----SVLRCSAENRNEPFAAARIGLALGVVSEITFGVPEEFL  
 NP\_254014.1 -----VTLQAEFGGGTQMSQMGAP-LKEIGQALVNMADIDYQTLGALA-IATSTHGTGVGF-G-SYSAQVRGLQLVTASG-----EVLECDAKRNVFVDFAARVSLGALGVTVRVLQNRRAAYL  
 MC04763851.1 -----DGLRVVQGPGLRLARLNEE--LAAGVALPITVSGVSGS IAGV--MSTGTHGSSHLTG-G-NIPSAVVGMRVLVTGKG-----DVLVL--DEHDELLPAARVALGALGVIETVLSVQPAFL  
 MBS1617249.1 -----EQKLTIVQAGIKLQWLQND--LDETEGLALINLGSIAQSIAGA-ISTATHGSGIYQF-R-ILASQVQFRTLQADG-----TPLTLDNRADAKETFDLAIISLGAALGVSEITTHICEAPFL  
 LIA212326.1 -----EAKQITVEAGRLKELNVI--LKDGLALSMLNLSIEQS IAGA-ISTGTHGTGIKF-S-ILSTQIALTLVNVNGK-----ELVSLDHEKDADIKAAALVSLGALGIIETVTVQICEAPFL  
 NE081287.1 -----DSQTVVTQAGLTKDLQNS--LAKHRLALPNLGSISAQTSIGA-MATATHGTGLNY-G-VLSTIIQEITLVNKG-----EVKIKSDENSQFLNAAKCHLGSGLVLTLEYKLVKTFEFDL  
 BA859503.1 -----ENQTVIVEAGVTIYELSQN-LARYGLALPNLGSISAQTSIGA-MATGTHGTGLGY-G-TMPTIIIEEITLVNGKG-----EIKVSNSESNQFFNAVKCHLGSGLGILTEYKLVKTESFDL  
 MCP8715902.1 DTPPEVKFVLTIVEAGTRVFELNEY-LKKHDLATQNLGSISDSQVAGL-ISTGTHGTSYHG--LVSQQVVSITFLNSAG-----ESITCSSIEKPEYFKAILLSLKGIGIITHVTLRTCPKYTI  
 P5P48796.1 -----ETGVRVTVRAGTPLSALDLA-LADHGLMLENMGDIDATQVAGA-LSTGTHGTGTFD-F-VMPTQAAAMRLVTADG-----DVLNL--ETDDDFRFLAQVSLGTLGVSTVTLVDVDPYRL  
 BA094255.1 -----KGGQTTIVQAGISQVLEE--LRKHGLTLQNFSSIQDQMGVAG-TQVAAGHTGATFL--TVEEMIVMRKLVTPSL-----GELESEQHEPELFQMAKVLGSLGCLGIVSEMTLRICPDHKL  
 XP\_844493.1 -----KSMTIVCEGGAISVDVEF--LSAHLMLRCVPSFVQTTVGGV-IATATHGSGIQR--SISDCVVRLLQVLDGRG-----ILHTFDATSPKELSLSACHLGMGLGVVSVTLQAEKKRLR  
 XP\_001682394.1 -----VAHTITCEAGAVMEVMSR-VSDHGLMVRNCGSVYRVTVGGC-IATATHSSGIQCH--CLSDYVRGLKIVDGC-----QIRTLVAGKDAAELRLAACHLGMVGVITVTLVQVPIRW  
 NP\_848862.1 -----EKKQTVVEAGIITDLHPQ--LDKHGLALSMLNLSIEQS IAGV--IGSGTHNTGIKH-G-ILATQVVALTLMKADG-----TVLECSSESNADVFQAAARVHLGCLGIVLTVTLQVCPQFHL  
 EDL85374.1 -----EKKQTVVEAGIILADLHPQ--LDEHGLASMLNLSIAGVSDVTAGV-IGSGTHNTGIKH-G-ILATQVVALTLMTADG-----EVLECSSESNADVFQAAARVHLGCLGILVITVTLQVCPQFHL  
 OCN1467.1 -----EKKQTVVEAGMLTDLPNKE--LDKRGALSMLNLSIEQSEVAAAGV-IGTGTHNTGITH-G-ILSTQVVALTLMTALG-----EILECSSESNPEIFQAAARLHGLSGLVSLVTQICRSAPFL  
 XP\_002122023.1 -----KRCQTVVEAGVTINELNENLPSHGLSLINLGSVSGQTVGGI-IGTGTHGSEKFG-G-SFATHVLVLMKADG-----TILRCSQQENAFISFSAACHLGLGILSVKLQCEAAFL  
 XP\_005443605.1 -----EKKQTVVEGGIISLDLNE--LSKHGLALANLGSIEQSEVAAAGV-IGTGTHNTGITH-G-ILSTQVVALTLLTASG-----EILECSSEINAFIQAARLHGLGCLGIVLTVFQCQVQFHL  
 XP\_024182616.1 -----EKKRVVQAGIRVRQQLVDG-IKDQGLTLQNFASIREQQIGGI-QVGAHGTGARLP-P-IDEQVISMKLVTPAK-----GTIEVSKKDEPLFYIARCLGGLGVVAAEVLQCVDRQEL  
 XP\_024165881.1 -----ANLAVTVDSGVGLRLKIDT-VEAAGLSLVAAPYWEQVSGIGL-ISTGSHGSSWMWKGGSVHDHIVGLSLIVPAKQSEGYAKIVL--EPKDQFLNAAKVSMLGLGVISKVLKLEKGFKR  
 XP\_008240731.1 -----EKKRVVQAGIRVRQQLVDG-IEKHEGLTLQNFASIREQQIGGI-QVGAHGTGARLP-P-IDEQVISMKLVTPAK-----GTIEVSKKDEPLFYIARCLGGLGVVAAEVLQCVDRQEL  
 XP\_008220057.1 -----KNLAVTVDAGIGLRLRIDT-VEAAGLSLVAAPYWEQVSGVGL-VSTGAHGSWMWKGGSVHDHIVGLSLIVPAKQSEGFYAKIVL--EPKDQFLNAAKVSMLGLGVISKVLKLEKGFKR  
 XP\_004291192.1 -----ANLAVTVDSGVGLRLKIDT-VEAAGLSLVAAPYWEQVSGIGL-ISTGSHGSSWMWKGGSVHDHIVGLSLIVPAKQSEGFYAKIVL--EPKDQFLNAAKVSMLGLGVISKVLKLEKGFKR  
 XP\_004303609.1 -----EKKRVVQAGIRVRQQLVDG-IKDQGLTLQNFASIREQQIGGI-QVGAHGTGARLP-P-IDEQVISMKLVTPAK-----GTIEVSKKDEPLFYIARCLGGLGVVAAEVLQCVDRQEL  
 NP\_190376.1 -----EKKRVVQAGIRVRQQLDGA-IKDQGLTLQNFASIREQQIGGI-QVGAHGTGARLP-P-IDEQVISMKLVTPAK-----GTIELSREKDEPLFYIARCLGGLGVVAAEVLQCVARHKL  
 NP\_182191.1 -----TAMTLTVESGVTLRQLIAE-AAKVGLDALPYAYYWMGLTVGGM-MGTGAHGSLSWKGGSVAVHDVYTERIVSPGSVNDGFAKVRVILSETTTPNEFNAAKVSMLGLGVISQVTLKQPMFKR  
 NP\_564393.1 -----EAKTLTVESGVTLRQLIGL-AAELELALPHAYYWMGLTVGGL-MGTGAHGSLSWKGGSVAVHDVYTERIVSPGLASDGYVKKVRLSETTDPDEFRAAKVSLGVGLVISQVTLQPMFKR  
 NP\_182198.1 -----TAMTMTVESGMTLRQLIVE-AAKVGLDALPYAYYWMGLTVGGM-MGTGAHGSLSWKGGSVAVHDVYTERIVSPGSVNDGFAKIRVILSETTTPNEFNAAKVSMLGLGVISQVTLQPMFKR  
 NP\_182197.1 -----KAMTLTVESGVTLRQLIAE-AAKVGLDALPYAYYWMGLTVGGM-MGTGAHGSLSWKGGSVAVHDVYTERIVSPGSVNDGFAKIRVILSETTTPNEFNAAKVSMLGLGVISQVTLQPMFKR  
 NP\_0020860.1 -----EAKTLTVESGVTLRQLINE-AAKFDLALPYAYYWMGLTVGGM-MGTGAHGSLSWKGGSVAVHDVYTERIVSPGLASDGYVKKVRLSETTDPDEFRAAKVSLGVGLVISQVTLQPMFKR  
 XP\_023896433.1 -----EAMTITVESGVTLRQLINE-AAKAEVLALPYAYYWMGLTIGL-LSTGAHSTLRDKGSVAVHDVYTERIVSPGLASDGYAKVREL--KDGQDFNAAKVSMLGLGVISQVTLKQPMFKR  
 XP\_023896434.1 -----EAMTITVESGVTLRQLINE-AAKAGLALPYAYYWMGLTIGL-LSTGAHSTLWANGSSVHDVLEVRIVTFFGA--GFARVRL--KDGQDFNAAKVSMLGLGVISQVTLKQPMFKR  
 XP\_023900169.1 -----GKTVRYVEAGIRVQLVDG-IKDSGLTLQNFASIREQQIGGI-QVGAHGTGARLP-P-IDEQVISMKLVTPAK-----GTIEVSKKDEPLFYIARCLGGLGVVAAEVLQCVDRQEL  
 XP\_023914113.1 -----DNLVTVTDAGVGLRELIDK-VEEAGLSLVAAPYWEQVSGVGL-ISTGAHGSWMWKGGSVAVHDVYTERIVSPGLASDGYVKKVRLSETTDPDEFRAAKVSLGVGLVISQVTLKQPMFKR  
 XP\_043131130.1 -----EDMTVTVFAGGDVYDLQIE-LKANGLSFNNLGSISQVQNFIQA-VSTGTHGTGSHV-G-NMATQVGLRVLDLDSG-----SLRVIDQTTNABELKAFRVLGALGLIETMTIKVHTYLV  
 XP\_002422445.1 KTFPEIKFVLTIVEAGIRFIFELNEY-LKRNRLATQNLGSISDSQIAGL-ISTGTHGTSYHG--LVSQQVSVKFLNSG-----ELTICSDIEKPEYFRAAILLSLKGIGIITHVTLRTCPKYTI  
 NP\_013624.1 -----PELHYADVTDGAMRLYQNEF-LGAKGYSIQNLGSISQS IAGV--ISTGSHGSSPYHG--LISQVNVNLVNVNGK-----ELKFLDEADNEPEVFKAAHLSVGKIGIIVSATVIRVPGFNI  
 NP\_003651626.1 -----ATGLCTQAGIRLRLASLA--LAAGLALPVLNLSIEQS IAGA-ISTGTHGSSLRHG--LVSECVALKVTLADG-----KTRCSPQOREPELFRALLSVGALGVVVEVTLRAVPAPFL  
 XP\_049145240.1 -----EGGSVTVIEAGVTFQLQAEY-LHARGASAGYTLVNNNITLAGC-VAMGAHRSSIREDS-MVAAGVLELIDIDNG-----ELRHLVRNNDDTTLAASSTSLGLGVVVRMKFKIYPDFKV  
 NP\_055577.1 -----KKQIVRVEPLVTMGQVLTAL-LTSGIWTPLVLELDDLTGVLGMLTGEISSHHY-G-LFQHCITAYELVADG-----SVFRCNTPENDSLFYAVPWSCTGLGFVLAARIVIPAKKY  
 XP\_004926865.1 -----ENNTVIRVEPLVTMGQSLT--LAPGLALPVVLELDDLTGVLGVMGTGVIETTSVHG-G-LFQHCYLEVLELADG-----SVNCSKDENADLIFYAVPWSYTGTLGFLTSIVIKVIPAKKY

|                 | 341           | 350             | 360               | 370               | 380             | 390    | 400     | 410                    | 420               | 430            | 440 | 450 | 460                | 465           |
|-----------------|---------------|-----------------|-------------------|-------------------|-----------------|--------|---------|------------------------|-------------------|----------------|-----|-----|--------------------|---------------|
| NP_0126287.1    | HRHQD----     | RRSLAQTLER--    | LD-EFVDGNDHFEFFVF | FPYADKALTR-----   |                 |        |         | TMHR--                 | SDEQP--           | KP-----        |     |     |                    |               |
| MBI20379321.1   | SAREE----     | PMPFDRVMAD--    | FE-QLVAENEHFEFFYF | PHTGNCNTC-----    |                 |        |         | RNNR--                 | STGPA--           | APVG-----      |     |     |                    |               |
| NP_254014.1     | RERQW----     | TARTEELLED--    | VE-KNTREQNQHWEMLV | THSDYALS-----     |                 |        |         | ALNE--                 | TDEPK--           | TPPL-----      |     |     |                    |               |
| MC04763851.1    | CETTE----     | TIPFDDAVRD--    | ME-AIARSAEYVKLWM  | LPHTDIAVVF-----   |                 |        |         | RSER--                 | TTEPG--           | R-----         |     |     |                    |               |
| MBS1617249.1    | HDRTY----     | SMDFDKMLEK--    | LD-DLVTTTDDHKMWMF | PHVKDILVY-----    |                 |        |         | QYQR--                 | TTAPA--           | N-----         |     |     |                    |               |
| HIA12326.1      | EEFAY----     | PVEFDEGVKR--    | IP-ELLKEHEHMKLWMF | PHVKELQVY-----    |                 |        |         | CQNRTKAEHLN-----       |                   |                |     |     |                    |               |
| NEO81287.1      | EVREQ----     | PETLETVLDK--    | LP-ERLQ-ADHYRWFYL | PHADRVWE-----     |                 |        |         | SATRKPPGKTA-----       | P-----            |                |     |     | KQNF               |               |
| BAY85903.1      | EVKEQ----     | PQSLATVFEN--    | LP-ESLK-SDHYRWFYL | PHVDMAWEW-----    |                 |        |         | TATRQLPEEST-----       | V-----            |                |     |     | KKNI               |               |
| MC08715902.1    | KSKQE----     | IINFDTLLSN--    | WD-NIWLESEFIRLWMF | PYTNKCVLW-----    |                 |        |         | --R--                  | ANKST--           | DPLS-----      |     |     |                    |               |
| PSP48796.1      | RERTF----     | PADVEAVLAD--    | LE-AY-RECRNEFEFWF | PHTDTALVK-----    |                 |        |         | TLDE--                 | TDAEG--           | APGR-----      |     |     |                    | IDGL          |
| BAO94255.2      | LETTY----     | PTDIAGIKKD--    | HE-ELLARKYRHYRVM  | MLPRTGKVVV-----   |                 |        |         | --VSNP--               | HAGG--            | QPLL-----      |     |     |                    | QKVS          |
| XP_844937.1     | RESR-----     | PIPRKLTGEBTKL   | KRIASESEFYRFWM    | PNPTDQCYESTAEFVGE | EAGDQTKRVDSEIKL | AMGK-- | KHEAT-- | LPMTAGNTIKTLTSS        | SKLRNFSSEKCNST    | GEDYQMWLNRQRTL |     |     |                    |               |
| XP_001682394.1  | KLVSQ----     | PLLMKDATNAALVA  | -EKVSKTEYYRWMWV   | PHPTDGCYES-----   |                 |        |         | YGRV--                 | ESTTGISALPPL----- |                |     |     | PDALTAQDDAPVQLS    | PAALQEESSERTN |
| NP_484862.1     | LETSF----     | PSTLKEVLDN--    | LD-SHLKSEYFRFLWF  | PHSENVSI-----     |                 |        |         | YQDH--                 | TNKEP--           |                |     |     |                    |               |
| EDL85374.1      | QETSF----     | PSTLKEVLDN--    | LD-SHLKSEYFRFLWF  | PHTENVSI-----     |                 |        |         | YQDH--                 | TNKAP--           |                |     |     |                    |               |
| OCT81467.1      | KEVPF----     | SSTLQEVLDN--    | LD-THLMSSEYFRFY   | WFPHTENVSVF-----  |                 |        |         | YQDP--                 | TDKPP--           |                |     |     |                    |               |
| XP_002122023.1  | HEKKA----     | SSKETVTLID--    | LN-EHVSSAQHFQFV   | WFPHTDNVVT-----   |                 |        |         | ARNR--                 | TRRLK--           |                |     |     |                    |               |
| XP_005443605.1  | HEVAF----     | PSTLTEVLDD--    | LD-DHLKRSQYFRFLWF | PHSENVSI-----     |                 |        |         | YQDP--                 | TNKPF--           |                |     |     |                    |               |
| XP_024182616.1  | VEHTT----     | VSNMEEIKKN--    | HK-KLLSENKHVKYLI  | PIPYTDTVVVV-----  |                 |        |         | TCNP--                 | VSKWK--           | GPPK-----      |     |     |                    | FKPKYTT       |
| XP_024165881.1  | SVSYD----     | FTDDQDIENK--    | YM-DHGKKEYFADITWY | PSKHTAAYR-----    |                 |        |         | YDNRVPLNTSG-----       | DGTY-----         |                |     |     | DFLGFQANPILVKS     | SVRAS         |
| XP_008240731.1  | VEHTS----     | VSNMEEIKKN--    | HK-KLLSENKHVKYLI  | PIPYTDTVVVV-----  |                 |        |         | TCNP--                 | VSKWK--           | GPPK-----      |     |     |                    | FKPKYGS       |
| XP_008220057.1  | SIAYD----     | FTDDAQIENI--    | YM-DHAKKYEADITWY  | PSKHTAAYR-----    |                 |        |         | YDNRVPLNAGS-----       | DGTY-----         |                |     |     | DFLGFQNSNILISK     | SIRAT         |
| XP_004291192.1  | SITYD----     | FTDDQDIEDK--    | YM-VHGKKEYFADITWY | PSKHTAAYR-----    |                 |        |         | SDNRVPLNAGS-----       | DGTY-----         |                |     |     | DFLGFQANPILVKS     | SVRAS         |
| XP_004303609.1  | VEHTT----     | VSNMEEIKKN--    | HK-KLLSENKHVKYLI  | PIPYTDTVVIV-----  |                 |        |         | TCNP--                 | VSKWK--           | GPPK-----      |     |     |                    | FKPKFTT       |
| NP_190376.1     | VEHTY----     | VSNLQEIKNK--    | HK-KLLSANKHKVKYLI | PIPYTDTVVVV-----  |                 |        |         | TCNP--                 | VSKWS--           | GPPK-----      |     |     |                    | DKPKYTT       |
| NP_182199.1     | SLRYV----     | MRNDSDFGDQ--    | AV-TFGMKHEFADFILW | PLSQGKVYR-----    |                 |        |         | MDDRVAVNTSG-----       | NGLL-----         |                |     |     | DFMPPFRQLSAAIAI    | IRSS          |
| NP_564393.1     | SLTFV----     | MQNDSDFGDQ--    | AV-TFGKHEFADFILW  | PLSQGKVYR-----    |                 |        |         | MDDRVPVNTSG-----       | NGLF-----         |                |     |     | DFFPFRPQLSVALAI    | IRSL          |
| NP_182198.1     | SLTYT----     | MRNDSDFEDQ--    | AV-TFGKHEFADFILW  | PLSQGKVYR-----    |                 |        |         | RDDRVAVNTSG-----       | NGLF-----         |                |     |     | DFLPFRQLSAAIAI     | IRTS          |
| NP_182197.1     | SLKYV----     | MRNDLDFNDE--    | AL-TFGKHEFADFVWL  | PLSQGKVYR-----    |                 |        |         | MDDRVAVNTLG-----       | NGLY-----         |                |     |     | DFFPFRQLSAVLATRRS  |               |
| NP_200460.1     | SLNYV----     | MRNDSDFGDQ--    | AV-SFGERHEFADFILW | PLSQGKVYR-----    |                 |        |         | MDDGRVPLNTSG-----      | DGLF-----         |                |     |     | EFFPFRQLSVLVAI     | DRSL          |
| XP_023896433.1  | SITYL----     | RKNDSDLGDM--    | VA-SFGNEHEFADITWY | PSQRKAVYR-----    |                 |        |         | IDDRVYNTHGHGMNGLY----- |                   |                |     |     | DFTPFRATASVELGIVRT |               |
| XP_023896434.1  | SITYL----     | TKDSDSLGDK--    | VT-SFGNEHEFADITWY | PSQRKAVYR-----    |                 |        |         | IDDRVNTNSPG-----       | NGLY-----         |                |     |     | DFTPFRSTASIALGA    | IRTT          |
| XP_023900169.1  | VEHTT----     | VSNVKEIKKN--    | HK-KLLSENKHVKYL   | PIPYTDTVVVV-----  |                 |        |         | TCNP--                 | VSKWR--           | GPPK-----      |     |     |                    | FTPKEYSS      |
| XP_023914113.1  | SVTYN----     | FTNDHDFEDV--    | FM-INHAKKYEADITWY | PSKNTAVYR-----    |                 |        |         | YDERVPLNVSG-----       | NGVY-----         |                |     |     | DFIGFQSNLILISK     | SIRAT         |
| XP_043131130.1  | KKTTRVLNATTDY | QAQMYKE--       | IA-QLYKEHDMTYV    | WGPHFD-----       |                 |        |         | WDSK--                 | AQDWA--           | TEPTY-----     |     |     |                    |               |
| XP_024224445.1  | KSKQE----     | IINFETLLNN--    | WN-NIWLESEFIRLWMF | PYTNKCVLW-----    |                 |        |         | --R--                  | ANKSI--           | DPLS-----      |     |     |                    |               |
| NP_013624.1     | KSTQE----     | VITFENLLKQ--    | WD-TLWTSSEFIRVMMW | PYTRKCVLW-----    |                 |        |         | RGNK--                 | TTDAQ--           | NG-----        |     |     |                    |               |
| XP_003651626.1  | AWSQT----     | IDADARLFTS--    | WEGELWQAEFVRVWMW  | FPMYRRAVVH-----   |                 |        |         | HADKVPREDIE--          | SGRV-----         |                |     |     |                    |               |
| XP_049145240.1  | YAQQK----     | TLEESEVLDD--    | DIYGMIAAPYATANF   | WMMYPRKHFHRR----- |                 |        |         | YDVVPTNTSD-----        |                   |                |     |     |                    |               |
| NP_055577.1     | VKLRF--       | EPVRLGLEIAI     | CAKTFHE--         | SQRQENHFEVGLLY    | SLDGAIVM-----   |        |         | TGVM--                 | TDE-A--           | EPSK-----      |     |     |                    | LNSI          |
| XP_0042926865.1 | VRHHY--       | YPFNNLSDPAKRSES | OKSLPNPHOFVEALL   | YTRDSGVLW-----    |                 |        |         | LGDM--                 | VDEVG--           | RDGK-----      |     |     |                    | LNPI          |

Conserved  
Cysteine (C) region

|                | 466       | 470                                                  | 480        | 490 | 500 | 510                                   | 520                               | 530                                 | 540              | 550                        | 560        | 570       | 580 | 590         |
|----------------|-----------|------------------------------------------------------|------------|-----|-----|---------------------------------------|-----------------------------------|-------------------------------------|------------------|----------------------------|------------|-----------|-----|-------------|
| NP_216287.1    | --RVSGW-- | VDDELLSNG                                            |            |     |     | GLSLICQTG                             | RRF                               | --PSVAPRLNRLM--                     | TNM              | -----MSSSTVQ--             | DRAYKVF    | --TCEKV-- |     | RFTEME      |
| MBI0379321.1   | --RVSGW-- | VDDELLSNG                                            |            |     |     | IFQVACSVG                             | RAV                               | --PATIPGIAKIS--                     | SRA              | -----LSARTYT--             | DIPYKVFT-- | SPERV     |     | RFVEME      |
| NP_254014.1    |           | DPAKEGEGNEFVGLIEGLD                                  |            |     |     |                                       | KYL                               | -----SDFPETRRTLNSLR--               | HFARFDERV        | --DDSYAVYA--               | NVENV      |           |     | RFNEME      |
| MCC04763851.1  |           | ISPVVRW--                                            | IDEHIVNQL  |     |     | LFATVVLWG                             | RWF                               | -----NGLIAPLNRLVARTYL--             | KPRRVV           | --GRSDKVMs--               | LAMPF      |           |     | RHREME      |
| MSB1617249.1   |           | DSRLRQW--                                            | LMDEVLSVS  |     |     | VYRFLVWIG                             | NFL                               | -----PSLRPFPPKILVLSFR--             | SPLDRI           | --EKSYRVFN--               | VADPP      |           |     | IHREAE      |
| HIA12326.1     |           | TGLFIW--                                             | VDEKILAKY  |     |     | ITFLLNLG                              | LWF                               | -----PTLTAPINRIKILKF--              | KKEHRI           | --DYSYRVFN--               | TEPPP      |           |     | KHHEAE      |
| NEO81287.1     |           | QRFQFSW--                                            | YREKLIGY   |     |     | TFELLLYA                              | TYN                               | -----QRLIPLVNRWVYQQMF--             | SKSKQSR          | --GNSVSQFN--               | FDCLF      |           |     | KQQVNE      |
| BAY85903.1     |           | LQRLRDW--                                            | YQKLIIGFY  |     |     | TFQLLLYA                              | TYN                               | -----QNLIPGINRWYAQQM--              | SQPKQSR          | --GDSLQSQFN--              | FDCLF      |           |     | KQQVNE      |
| MCP8715902.1   |           | --DRPWSW--                                           | YGTKLGRF   |     |     | FYESLLWVSVHLY                         | --PSSTPYVERFVFGQQYGNVETLKGKDIAV-- | Q-NSVEGLN--                         | MDCLF            |                            |            |           |     | SQFVNE      |
| PSP48796.1     |           | EERLENL--                                            | VWEACCRAG  |     |     | -----TRA--                            | RPLAPALNRAVAATFS                  | -----DSErv--                        | GPARDVFP--       | TTAV                       |            |           |     | RFNETE      |
| BAO94255.2     |           | EDPTLPMRQLLSKKVGVP                                   |            |     |     | AGESEGLSFAQLRDALLDLN                  | PLD                               | -----TAHVDEVNRAEAEFWQ--             | RNSAQLR          | --S-DSTEVLG--              | FEQGG      |           |     | SQRVLE      |
| XP_844937.1    |           | RTRICKI--                                            | LKGSWLRHG  |     |     | -----VVEAALAAA--                      | VIQ                               | -----PGIQPYINRTYRRLFY--             | NAPEVQY          | --G-TSLECF--               | FDCLF      |           |     | KQWACE      |
| XP_001682394.1 |           | ESAEERAGDRSISLIVKSA                                  |            |     |     | LKYIATDFVRHQVVECSLYAA                 | CLC                               | -----PAIQPVYNKAYRRAFF--             | SAPQVQR          | --G-SALECF--               | FDCLF      |           |     | KQWANE      |
| NP_848862.1    |           | --SSASNW--                                           | FDWYAIIFY  |     |     | -----LLEFLLWTS--                      | TYL                               | -----PRLVGWINRFFFWLLF--             | NCKKESS          | --NLSHKIFS--               | YBCRF      |           |     | KQHVDQ      |
| EDL85374.1     |           | --SSASNW--                                           | FDWYAIIFY  |     |     | -----LLEFLLWTS--                      | TYL                               | -----PCLVGWINRFFFWMLF--             | NCKKESS          | --NLSHKIFT--               | YBCRF      |           |     | KQHVDQ      |
| OCT81467.1     |           | --SSKANW--                                           | FRDTPFLGNY |     |     | -----LLEFLLWIS--                      | TFI                               | -----TGMVPWINRFFFWLLF--             | ASKSEQV          | --NISHKVFN--               | FDCLF      |           |     | KQHVDQ      |
| XP_002122023.1 |           | --LVKNWN--                                           | FKDIIIGHH  |     |     | -----LLEFCLWIA--                      | TFP                               | -----SSIVPLITSVFFKFCY--             | EGSSECI          | --DRSDKIFN--               | IDCLF      |           |     | KQVYTE      |
| XP_005443605.1 |           | --SSASW--                                            | LWDYAVGY   |     |     | -----LLEFLLWIS--                      | TFV                               | -----PSLVWINRFFFWLLF--              | SSRVENI          | --SISYKIFN--               | YBCRF      |           |     | KQHVDQ      |
| XP_024182616.1 |           | DEAIQHVRDLYRECLKKYRVV                                |            |     |     | P-DNSVDINELSFTELRDKLLALN              | PLN                               | -----KDHIKVVNQAEAEFWR--             | KSEGYRV          | --G-WSDEILG--              | FDGGQQ     |           |     | WVSETCFPAGT |
| XP_024165881.1 |           | EKVMDNNGHNLGGKCLIAS                                  |            |     |     | -----SFLGYKKLVANGL--                  |                                   | KNGLIFTGYPVIGNQG                    | -----KMQTSGSCL-- | Y-STGKDS--                 | CAWDP      |           |     | RINGLFFYETT |
| XP_008240731.1 |           | DEAIQHVRDLYRECLKQCSVV                                |            |     |     | PVKNDVDINELSFTELRDKLLALD              | PLD                               | -----KDHVVKVNQAEAEFWR--             | KSEGYRV          | --G-WSDEILG--              | FDGGQQ     |           |     | WVSETCFPAGT |
| XP_008220057.1 |           | EKTMNDNGRSLGGKCTMAA                                  |            |     |     | -----SFLGYKKLVANGL--                  |                                   | KNGLIFTGYPVIGNQG                    | -----KMQTSGSCL-- | Y-STAADNS--                | CAWDP      |           |     | RINGLFFYETT |
| XP_004291192.1 |           | EKVMNDNGHSLGGKCLLAS                                  |            |     |     | -----SFLGYKKLVANGL--                  |                                   | KNGLIFTGYPVIGNQG                    | -----KMQTSGSCL-- | Y-STSQASS--                | CAWDP      |           |     | RINGLFFYETT |
| XP_004303609.1 |           | DEAIQHVRDLYRECLKKYRVV                                |            |     |     | P-DNSVDINELSFTELRDKLLIALN             | PLN                               | -----KDHIKVVNQAEAEFWR--             | KSEGYRV          | --G-WSDEILG--              | FDGGQQ     |           |     | WVSETCFPAGT |
| NP_190376.1    |           | DEAVQHVRDLYRESIKYRVQDSGKKSPPDSSEPDIIQELSFTELRDKLLALD | PLN        |     |     | DVHVAKVNQAEAEFWK                      | -----KSEGYRV--                    | G-WSDEILG--                         | FDGGQQ           |                            |            |           |     | WVSECFPAGT  |
| NP_182199.1    |           | EETQERFRDANGKCAAGT                                   |            |     |     | -----LITSLTFATSYGLT--                 |                                   | NNGMIFTGYPVIGSQN                    | -----RMMSSGSCL-- | D-SLHDGLI--                | TACPWDS    |           |     | RKSGEFFHQT  |
| NP_564393.1    |           | EESSESSGDANDKCARAE                                   |            |     |     | -----QITSPFLFSISYGV--                 |                                   | NNGMEFTGYPVIGSQN                    | -----HMMSSGTC--  | D-SHQDGLI--                | TSCPWDP    |           |     | RKGGQFFHQT  |
| NP_182198.2    |           | EETQERFRDANGKCVGAT                                   |            |     |     | -----IISSTLFPAPSYGLT--                |                                   | NNGIFTGYPVIGSQN                     | -----RMMSSGSCL-- | D-SLQDGLI--                | TACAWDS    |           |     | RKSGEFFHQT  |
| NP_182197.1    |           | EETQETLRDANGKCVTAT                                   |            |     |     | -----TISSTLFSTSYGLT--                 |                                   | NNGITFTGYPVIGSQN                    | -----RMMSSGSCL-- | D-GLDKLI--                 | SACAWDS    |           |     | RVKGVFYHQT  |
| NP_200460.1    |           | EESSESLDANMCKVRAK                                    |            |     |     | -----LVSSSMFLMSYGV--                  |                                   | NNGLIFTGYPVIGMQN                    | -----HMMSSGSCL-- | D-SRQDGLI--                | TACPWDP    |           |     | RKGGQFFHQT  |
| XP_023896433.1 |           | EEVQESLSDAAGKCLGAE                                   |            |     |     | -----TVILALETATGYLS--                 |                                   | NNGILFTGYPVIGYHN                    | -----HLQASGTC--  | D-SLNDALI--                | TACAWDP    |           |     | RVKGEFFHQT  |
| XP_023896434.1 |           | EDFQESLSDAIGKCLSAE                                   |            |     |     | -----TVILTLKTATGYLS--                 |                                   | NNGILFTGYPVIGYHN                    | -----RFQASGTC--  | D-SLDEALI--                | TACAWDP    |           |     | RVKGEFFHQT  |
| XP_023900169.1 |           | DEAIQHVRDLYKDSFKYRKITTT                              |            |     |     | ETPDSNEPDINELSFTELRDKLLAMD            | PLN                               | -----KDVIKINQAEAEFWR--              | KSEGYRV          | --G-WSDEILG--              | FDGGQQ     |           |     | WVSETCFPAGT |
| XP_023914113.1 |           | EKTFTNTRDVGKCTLAT                                    |            |     |     | -----TTVAACKLVGNGL--                  |                                   | KNGLIFTGYPVIGQQG                    | -----KMQTSGSCL-- | Y-SSSSFST--                | CAWDP      |           |     | RINGLFFYETT |
| XP_043131130.1 |           | --FASWWEPTNYTGVRNC                                   |            |     |     | -----TLNYCANGCG--                     |                                   | DCKKNYICYDEVSDAV                    | -----SCGPEGVC--  |                            | THQFYA     |           |     | HFFPAE      |
| XP_002422445.1 |           | --DRPWSW--                                           | YGTKLGRF   |     |     | -----FYESLLWISVKEF--                  |                                   | PKLTPTFIEKPIFNQYQGVETLKGKDIAV       | Q-NSVEGLN--      | MDCLF                      |            |           |     | SQFVNE      |
| NP_013624.1    |           | --PAKSW--                                            | WGTKLGRF   |     |     | -----FYETLLWISTKIY--                  |                                   | APLTPEVEKVFVFNRGYQGLKESSTGDVNV      | T-DSISGFN--      | MDCLF                      |            |           |     | SQFVDE      |
| XP_003651626.1 |           | --RHRRTSFLDSDRLGYH                                   |            |     |     | -----VYHNLALA--                       | RWF                               | -----PRITPVIEWFVGLNNGYFRNGERTRVSGV  | Q-PSYAEFL--      | LNGLY                      |            |           |     | SQFVNE      |
| XP_049145240.1 |           | ---QQGFQNTFSVTDLEG                                   |            |     |     | -----TTARTLLDSG--                     | RYL                               | -----PTSNMLAEIIFFLGWSKPNFREKTTNQPIE | W-PVYGNW--       | YDVLIGGLYDPQRPLWEVGVQGYTLE |            |           |     |             |
| NP_055577.1    |           | GNYYKPW--                                            | FFKHVENYL  |     |     | -----KTNREGLEYIPLRHHYHRTSRISFWELQDII  | IPFGNNPIFRYLEFGWMVPPKISLLKL       | --T-QGETLRKLYE--                    |                  |                            |            |           |     | HHVVDQ      |
| XP_004926865.1 |           | GVWHAEW--                                            | FFKQVEKHL  |     |     | -----KRRKRTAIEYIPLRDYHHRTSRISFWELQDII | ISFGNNPIFRYLEFGWLMPEVSLLLKL       | --T-QPEAVTKLYN--                    |                  |                            |            |           |     | AHVVDQ      |

Glu-Arg pair (EXR)  
region

|                | 591 | 600       | 610        | 620                    | 630   | 640                      | 650                 | 660       | 670        | 680      | 690       | 700           | 710         | 715         |
|----------------|-----|-----------|------------|------------------------|-------|--------------------------|---------------------|-----------|------------|----------|-----------|---------------|-------------|-------------|
| NP_216287.1    | YAI | PREN      | ---GREALQ  | RVIDLVR                |       | -----RSLPIMFPIEVR        |                     |           |            | SAPD     | DSFLSTA   |               |             | YGRDTCYIAV  |
| MBI0379321.1   | YAV | PREA      | ---AVTVR   | ELKATVER               |       | -----SGLRVSFPVEVR        |                     |           |            | APADDI   | PLSTA     |               |             | SGRETAYIAV  |
| NP_254014.1    | YSV | PAEH      | ---GPAC    | LEILALIRD              |       | -----KDLRTWFPIEVR        |                     |           |            | VKADDI   | PLSMF     |               |             | EGRDSCSISV  |
| MCC04763851.1  | YSV | PMTK      | ---AGAL    | LQRTALIGS              |       | -----HNLRVNFIIEVR        |                     |           |            | VRGDDA   | WLSPA     |               |             | TARDSQCLGA  |
| MSB1617249.1   | WAF | DLRD      | ---AREV    | LISAYKMI               | DE    | -----SDHKINFIQIE         |                     |           |            | VKGGDY   | ALSPC     |               |             | YRRDSIWI    |
| HIA12326.1     | YAI | PVEK      | ---AGEAM   | QIRKMI                 | DE    | -----RLRHVNFIIEVR        |                     |           |            | VKADDI   | CLISPA    |               |             | FGRTDTCYVGA |
| NEO81287.1     | WAI | PIEH      | ---TAEAI   | LIQIRMIKE              |       | -----KDYQVHLPIEVR        |                     |           |            | VKGGDI   | WLSPC     |               |             | QCRDSCYIGV  |
| BAY85903.1     | WAI | PIEY      | ---TVQAE   | LEIRDLIQ               |       | -----KDYKAHLPIEVR        |                     |           |            | VKGGDI   | WLSPC     |               |             | QCRDSCYIGI  |
| MCP8715902.1   | WSA | PLVS      | ---GPEV    | LKELKQIITN             | --AA  | -----NNGDFYVHAPIEVR      | CSNVVTSY            | SNKPF     | IENDGKPS   | LYPSQEWL | SHRSKTS   | SAGPIPGNNLR   | APFLD       | NSPNLPYTTKE |
| PSP48796.1     | YGV | PRDD      | ---AVAA    | FRDLRSVSES             |       | -----HDVMFPIEVR          |                     |           |            | VAGDDI   | PLSPA     |               |             | TGRDSTFIAV  |
| BAO94255.2     | VAF | IKTPLADIE | FMKVLAVIEA |                        |       | -----RGIPAPAPIEVR        |                     |           |            | TARSAQ   | PMSPASPT  |               |             | PGDFPSWVGI  |
| XP_844937.1    | WAI | DISN      | ---VMPA    | FHYLRLGISS             |       | -----ENLSVHFPIEVR        |                     |           |            | TGADTA   | ALSPA     |               |             | HGRQTCWIGI  |
| XP_001682394.1 | WAI | DASR      | ---AVEAF   | NRLRDMIDR              |       | -----EGMLLHFPPIEVR       |                     |           |            | TAPDVS   | DMSPA     |               |             | VRGPTCWI    |
| NP_848862.1    | WAI | PREK      | ---TKEAL   | LEKAMLEA               |       | -----HPKVVAHYPIEVR       |                     |           |            | TRGDDI   | LSPC      |               |             | FQRDSCYMINI |
| EDL85374.1     | WAI | PREK      | ---TKEAL   | LEKAMLEA               |       | -----HPKVVAHYPIEVR       |                     |           |            | TRGDDI   | LSPC      |               |             | FQRDSCYMINI |
| OCT81467.1     | WAI | PIEK      | ---TKDAL   | MQLKGVLEK              |       | -----NPHVVAHYPIEVR       |                     |           |            | ARGDDI   | LSPC      |               |             | FQRDSCYMINI |
| XP_002122023.1 | WAI | PRRH      | ---TAIV    | LREMKNWIEN             |       | -----NPDCKIHFPIEVR       |                     |           |            | VQKDN    | IMMAPS    |               |             | CEQDVTYIGI  |
| XP_005443605.1 | WAI | PIEK      | ---TKEAL   | LELKGALEN              |       | -----NPKLVVAHYPIEVR      |                     |           |            | TRGDEI   | WLSPC     |               |             | FQRDSCYMINI |
| XP_024182616.1 | LAK | FSMK      | ---DLEY    | IADLKQIEK              |       | -----EEIPAPAPIEVR        |                     |           |            | TASTKS   | PMSPASSR  |               |             | EDDIFSWVGI  |
| XP_024165881.1 | AIF | PAPK      | ---FRDF    | ILDVKKLRDLVKPE         |       | -----NFCGVDIYNGFLIE      |                     |           |            | IKASEA   | YLG       |               |             | PQESVSVVDF  |
| XP_008240731.1 | LSK | PSLK      | ---DLEY    | IEDVKQLIEK             |       | -----NEVPAPAPIEVR        |                     |           |            | TACTKS   | PMSPASSTK |               |             | DDIFSWVGI   |
| XP_008220057.1 | AIF | PASK      | ---FGDF    | IRDVKKLRDL             | KPD   | -----NFCGVDIYNGFLIE      |                     |           |            | IRATGA   | YLG       |               |             | QFEDSVVDF   |
| XP_004291192.1 | AIF | PAPK      | ---FRDF    | ILDVKKLRDLVKTE         |       | -----NFCGVDIYNGFLIE      |                     |           |            | IKASEA   | YLG       |               |             | PQESVSVVDF  |
| XP_004303609.1 | IAK | FSMK      | ---DLEY    | IEDLKQIEK              |       | -----EEIPAPAPIEVR        |                     |           |            | TASTKS   | PMSPASSL  |               |             | EDDIFSWVGI  |
| NP_190376.1    | LAN | FSMK      | ---DLEY    | IEELKKLIEK             |       | -----EAIPAPAPIEVR        |                     |           |            | TARSKS   | PISPAFSTS |               |             | EDDIFSWVGI  |
| NP_182199.1    | FSI | PLTQ      | ---VKSF    | INDIKSLVKI             | ESK   | -----SLCVLELYDGLIMRY     |                     |           |            | VTSSPA   | YLG       |               |             | KETEALDFDL  |
| NP_564393.1    | FSI | PLTR      | ---VKGF    | INDIKALVKI             | EPK   | -----SLCALERSNGILIRY     |                     |           |            | VTSSPA   | FLG       |               |             | KEEKALDFDL  |
| NP_182198.2    | LSV | PLTQ      | ---VKSF    | ISIDIKSLVKI            | EQK   | -----SLCGLLEHYGILIMRY    |                     |           |            | VTSSPA   | YLG       |               |             | KETEALDFDI  |
| NP_182197.1    | FSI | PLTQ      | ---VKSF    | INDIKSLVKI             | DSK   | -----SLCGLLEHYGILIMRY    |                     |           |            | VTSSPA   | YLG       |               |             | KETEALDFDI  |
| NP_200460.1    | FSV | SLTN      | ---VKSF    | INDIKALVKI             | EPK   | -----SLCVLEGSNGILIRY     |                     |           |            | VTSSLA   | FLG       |               |             | KEEKALDFDL  |
| XP_023896433.1 | FSV | GLSV      | ---AKSF    | IQDVQKLIEL             | EPK   | -----AMCGVELYNGILIMRY    |                     |           |            | VKASSA   | YLG       |               |             | KQEDAI      |
| XP_023896434.1 | FSV | GLSV      | ---AKSF    | IQDVQKLIEL             | VPK   | -----AMCGVELYNGILIMRY    |                     |           |            | VKASSA   | YLG       |               |             | KQEDAI      |
| XP_023900169.1 | LAK | FSMK      | ---DLEF    | IEDQKLIEK              |       | -----QDIPAPAPIEVR        |                     |           |            | TARSKS   | PMSPASSG  |               |             | EDDIFSWVGI  |
| XP_023914113.1 | AIF | PAPK      | ---PGDF    | IRDVKKLRDL             | NPE   | -----NFCGVDIYNGFLIE      |                     |           |            | IKASGA   | YLG       |               |             | PQESVSVVDF  |
| XP_043131130.1 | YL  | LEAA      | ---NYTL    | FQSQS                  | TPRMK | -----APYNEQMVPIEVR       |                     |           |            | LKGGDA   | YLS       | SPVNTYN       |             | LGPESSGVFA  |
| XP_002422445.1 | WSS | PLNS      | ---GPD     | LILNLKKI               | IID   | --AA                     | -----EKNDFYVHAPIEVR | CSNVVTSY  | SNKPF      | IENDGKPS | LYPSQEWL  | SHRSKTS       | SAGPIPGNNLR | APFLD       |
| NP_013624.1    | WGC | PMDN      | ---GLEV    | LRSLDLSIAQ             | --AA  | -----INKEFYVHVMPIEVR     | CSNTTLPSE           | PLDTSKRTN | --TSPG     | PVYGNVCR | PFPLDNT   | PSHCRFAPLENVT |             | NSQLTLYINA  |
| XP_003651626.1 | WAI | PLHK      | ---GPEAL   | QRLSAMLNRLRPGDPGYVEHRI | PFS   | EAAGLWYHS                | PVEV                | YSDTTVNAS | -----ARGNR | PWLVDTP  |           |               |             | ADGALYILNA  |
| XP_049145240.1 | LAF | PIITQ     | ---ANAML   | KRVRAFLDD              |       | -----EAKKLIVMTSTVRSKINIK |                     |           |            | GRPY     | FDLLGQV   | TYGTADGAD     |             | WSKGVIMLNA  |
| NP_055577.1    | MLV | PMKC      | ---LQQA    | LHTFQNDIHV             |       | -----YPWLCPPIE           |                     |           |            | LPSQP    | GLVHPK    |               |             | GNEAEYIDI   |
| XP_004926865.1 | MLI | PIEL      | ---LEKAI   | IAFFHDEF               | EV    | -----YPWLCPPIE           |                     |           |            | NNPQ     | GLKIKP    |               |             | GEESQMFVDI  |

# HWXK motif

|                | region  |                                      |                                     |                 |           |            |       |                                                             |       |     |     |     |     |     |  |  |
|----------------|---------|--------------------------------------|-------------------------------------|-----------------|-----------|------------|-------|-------------------------------------------------------------|-------|-----|-----|-----|-----|-----|--|--|
|                | 716     | 720                                  | 730                                 | 740             | 750       | 760        | 770   | 780                                                         | 790   | 800 | 810 | 820 | 830 | 840 |  |  |
| NP_216287.1    | HQY     | -----                                | AG-MEFESYFRA                        | ---VEEIMD-DYAG  | ---       | RPHWGKRHY  | ----- | QTAAT                                                       | ----- |     |     |     |     |     |  |  |
| MBI0379321.1   | HLV     | -----                                | RG-TPHRAAYTA                        | ---AEQIMI-AHGG  | ---       | RPHWGKLHS  | ----- | RDAAY                                                       | ----- |     |     |     |     |     |  |  |
| NP_254014.1    | HQH     | -----                                | YS-MDHHNFFAA                        | ---VEPIFW-KYAG  | ---       | RPHWGKLLHG | ----- | LNAHQ                                                       | ----- |     |     |     |     |     |  |  |
| MCO4763851.1   | YMA     | -----                                | ES-EGIERYPGA                        | ---FQGAMK-ALGG  | ---       | RPHWGKEFQ  | ----- | ANVAE                                                       | ----- |     |     |     |     |     |  |  |
| MBS1617249.1   | YLI     | -----                                | GD-RGWDALLHD                        | ---FEALAV-KYNG  | ---       | RPHWGKXYH  | ----- | IDRAY                                                       | ----- |     |     |     |     |     |  |  |
| HIA12326.1     | YKA     | -----                                | GD-RGWKEYLHG                        | ---FEEIMA-AYDG  | ---       | RPHWGKEFS  | ----- | IDKNA                                                       | ----- |     |     |     |     |     |  |  |
| NEO81287.1     | ITY     | ---MPY                               | ---GKY-VDCQSYFDD                    | ---YEKIMA-KLDG  | ---       | RPHWAKKFG  | ----- | PDADK                                                       | ----- |     |     |     |     |     |  |  |
| BAY85903.1     | INY     | ---MPY                               | ---GKR-VDCRDYFND                    | ---YEKIMA-KFDG  | ---       | RPHWAKRFG  | ----- | PDADK                                                       | ----- |     |     |     |     |     |  |  |
| MCP8715902.1   | TMY     | ---RPF                               | ---GTN-VETHQWFQL                    | ---FENVMS-KAGG  | ---       | KPHWAKNFIG | ----- | LTQDEKYNEKEDLKTQLEFGGKPFYSMIGFKPVMKDFWGEDLVKFNNVRKETDPHG VF | ----- |     |     |     |     |     |  |  |
| PSP48796.1     | HAY     | -----                                | HR-REWETLVRE                        | ---AEA VFD-RYDG | ---       | RPHWGKHHT  | ----- | KTAAE                                                       | ----- |     |     |     |     |     |  |  |
| BAO94255.2     | IMY     | NTPGQDEQGLEKVAKAFKSYCAALEGVHQ        | ---EYGA                             | ---             | VPHWAKVEP | -----      | CDDPA | -----                                                       |       |     |     |     |     |     |  |  |
| XP_844937.1    | VMY     | ---RPY                               | ---LRHARDTLRYDA                     | ---FSKAMT-VMGG  | ---       | RPHWAKYYT  | ----- | WGPEQ                                                       | ----- |     |     |     |     |     |  |  |
| XP_001682394.1 | VMY     | ---RPY                               | ---GQEARDTRRCYDG                    | ---FCRVME-EMGG  | ---       | RPHWAKYYD  | ----- | WGHRE                                                       | ----- |     |     |     |     |     |  |  |
| NP_848862.1    | IMY     | ---RPY                               | ---GKD-VPRLDYWLA                    | ---YETIMK-KFGG  | ---       | RPHWAKAHN  | ----- | CTRKD                                                       | ----- |     |     |     |     |     |  |  |
| EDL85374.1     | IMY     | ---RPY                               | ---GKD-VPRLDYWLA                    | ---YETIMK-KFGG  | ---       | RPHWAKAHN  | ----- | CTRKD                                                       | ----- |     |     |     |     |     |  |  |
| OCT81467.1     | IMY     | ---RPY                               | ---GKD-VAHQEYWVE                    | ---YENIMK-KVGG  | ---       | RPHWAKAHT  | ----- | CTRKD                                                       | ----- |     |     |     |     |     |  |  |
| XP_002122023.1 | ISY     | ---RPY                               | ---GKL-VPHDKWFTF                    | ---YENLAL-KYGG  | ---       | RPHWAKDHK  | ----- | VNSQT                                                       | ----- |     |     |     |     |     |  |  |
| XP_005443605.1 | IMY     | ---RPY                               | ---GKN-VPRLNMYLT                    | ---YEGIMK-KYGG  | ---       | RPHWAKAHS  | ----- | CTRKD                                                       | ----- |     |     |     |     |     |  |  |
| XP_024182616.1 | IMY     | ---LPTTDAQRKRDITEEFFHYRHLTQTRLWDITYG | ---                                 | ---             | ---       | RPHWAKIEV  | ----- | PKDKE                                                       | ----- |     |     |     |     |     |  |  |
| XP_024165881.1 | NPY     | ---RAD-DASTP-RFDQDVWEE               | ---VEQLAFFKHSS                      | ---             | ---       | YBHWAKNRN  | ----- | MAFLN                                                       | ----- |     |     |     |     |     |  |  |
| XP_008240731.1 | IMY     | ---LPTTDAQRKRDITEEFFHYRHLTQVLWDKYGA  | ---                                 | ---             | ---       | KPHWAKIEV  | ----- | PKDKE                                                       | ----- |     |     |     |     |     |  |  |
| XP_008220057.1 | NYF     | ---RAD-DALTP-RFNQDVWEE               | ---VEQLAFFKYSA                      | ---             | ---       | YBHWAKNRN  | ----- | LAFLD                                                       | ----- |     |     |     |     |     |  |  |
| XP_004291192.1 | NPY     | ---RAD-DALTP-RFDQDVWEE               | ---VEQLAFFKHGA                      | ---             | ---       | RPHWAKNRN  | ----- | IAFLN                                                       | ----- |     |     |     |     |     |  |  |
| XP_004303609.1 | IMY     | ---LPTTDAQRKRDITEEFFHYRHLTQTRLWDITYG | ---                                 | ---             | ---       | KPHWAKIEV  | ----- | PKDKE                                                       | ----- |     |     |     |     |     |  |  |
| NP_190376.1    | NPY     | ---RAD-DASTP-RFDQDVWEE               | ---VEQLAFFKHSS                      | ---             | ---       | YBHWAKNRN  | ----- | MAFLN                                                       | ----- |     |     |     |     |     |  |  |
| NP_182199.1    | TYT     | ---RAK-DPLSP-RLYEDFIEE               | ---IEQIALFKYSA                      | ---             | ---       | YBHWGKNRN  | ----- | LAFDG                                                       | ----- |     |     |     |     |     |  |  |
| NP_564393.1    | TYT     | ---RSKDDPLAP-RLYEDFIEE               | ---IEQMAIFKYNA                      | ---             | ---       | LPHWGKNRN  | ----- | LAFDG                                                       | ----- |     |     |     |     |     |  |  |
| NP_182198.2    | TYT     | ---RAK-DPLTP-RLYEDFIEE               | ---IEQIALFKYNA                      | ---             | ---       | LPHWGKNRN  | ----- | LAFDG                                                       | ----- |     |     |     |     |     |  |  |
| NP_182197.1    | TYT     | ---RAN-DPLTP-RLYEDFIEE               | ---IEQIALFKYNA                      | ---             | ---       | LPHWGKNRN  | ----- | LAFDG                                                       | ----- |     |     |     |     |     |  |  |
| NP_200460.1    | TYT     | ---RSKNDPLAP-RLYEDYIEE               | ---IEQMAIFKYNA                      | ---             | ---       | LPHWGKNRN  | ----- | LAFDG                                                       | ----- |     |     |     |     |     |  |  |
| XP_023896433.1 | TYT     | ---RSK-DPLTP-RLFEDILEE               | ---VEQLALFKYNA                      | ---             | ---       | LPHWGKNRN  | ----- | IAFDG                                                       | ----- |     |     |     |     |     |  |  |
| XP_023896434.1 | TYT     | ---RSK-DPLTP-RLYEDILEE               | ---VEQLALFKYNA                      | ---             | ---       | LPHWGKNRN  | ----- | IAFDG                                                       | ----- |     |     |     |     |     |  |  |
| XP_023900169.1 | IMY     | ---LPTMDAQRKRDITEEFFHYRHLTQSLWDYSA   | ---                                 | ---             | ---       | YBHWAKIEV  | ----- | PKDKE                                                       | ----- |     |     |     |     |     |  |  |
| XP_023914113.1 | NPY     | ---RAS-EASTP-RLNQDVWEE               | ---VEQMAFFKYGA                      | ---             | ---       | KPHWAKNRN  | ----- | LAFLD                                                       | ----- |     |     |     |     |     |  |  |
| XP_043131130.1 | VLE     | ---IDW                               | ---MQEYNNFTTLWQNQELAEFLP-RFGEAYNVRS | HNWKMSP         | ---       | ---        | ---   | ANSTY                                                       | ----- |     |     |     |     |     |  |  |
| XP_002422445.1 | TMY     | ---RPF                               | ---GTN-VETHKWQFL                    | ---FENVMS-KAGG  | ---       | KPHWAKNFIG | ----- | LTQDEKYDKLSDLKTQLEFGGKPFYTM LGFKPVMKNWFGKDLIDFNNVRKQTDPEGVF | ----- |     |     |     |     |     |  |  |
| NP_013624.1    | TIY     | ---RPF                               | ---GCN-TP IHKWFTL                   | ---FENTMM-VAGG  | ---       | KPHWAKNFIG | ----- | LAAGVPVKKDTDYDD                                             | ----- |     |     |     |     |     |  |  |
| XP_003651626.1 | TMY     | ---RPYFRDPTG-EATERYYAA               | ---FEWLMR-DLGG                      | ---             | ---       | RPHWAKTFT  | ----- | VSPDE                                                       | ----- |     |     |     |     |     |  |  |
| XP_049145240.1 | PTF     | ---RPT                               | ---VGDHSRFNEPFYHN                   | ---LAKVLIDEFPC  | ---       | RPHWTKNTR  | ----- | EVFAQ                                                       | ----- |     |     |     |     |     |  |  |
| NP_055577.1    | GAYGEPR | ---VGH                               | ---FEARSCMRQ                        | ---LEKFVRSVHGF  | ---       | QMLYADCYM  | ----- | NREE                                                        | ----- |     |     |     |     |     |  |  |
| XP_004926865.1 | GVYGVPK | ---AKG                               | ---FETIASTRH                        | ---VESFVIQNGQF  | ---       | QMLYADTYT  | ----- | TREE                                                        | ----- |     |     |     |     |     |  |  |

|                | 841   | 850                                      | 860                                         | 870                                     | 880   | 890 | 900 | 910 | 920 | 930 |  |  |
|----------------|-------|------------------------------------------|---------------------------------------------|-----------------------------------------|-------|-----|-----|-----|-----|-----|--|--|
| NP_216287.1    | ----- | NDYTRRVLPZ                               | -----                                       |                                         |       |     |     |     |     |     |  |  |
| MBI0379321.1   | ----- | NDYLRRVLGDZ                              | -----                                       |                                         |       |     |     |     |     |     |  |  |
| NP_254014.1    | ----- | NAHLSLIGVTZ                              | -----                                       |                                         |       |     |     |     |     |     |  |  |
| MCO4763851.1   | ----- | NRFVARLFESTEEIHZ                         | -----                                       |                                         |       |     |     |     |     |     |  |  |
| MBS1617249.1   | ----- | NMTIDAICGTIZ                             | -----                                       |                                         |       |     |     |     |     |     |  |  |
| HIA12326.1     | ----- | NRFVREYIMZ                               | -----                                       |                                         |       |     |     |     |     |     |  |  |
| NEO81287.1     | ----- | NSYSDRVLGKPKQKTALSSYZ                    | -----                                       |                                         |       |     |     |     |     |     |  |  |
| BAY85903.1     | ----- | NSYSDRVLGKGRGZ                           | -----                                       |                                         |       |     |     |     |     |     |  |  |
| MCP8715902.1   | ----- | LSGKVWAERNGILLDZ                         | -----                                       |                                         |       |     |     |     |     |     |  |  |
| PSP48796.1     | ----- | NEHLRVDVFGAZ                             | -----                                       |                                         |       |     |     |     |     |     |  |  |
| BAO94255.2     | ----- | NDLIERVIGHZ                              | -----                                       |                                         |       |     |     |     |     |     |  |  |
| XP_844937.1    | ----- | NGWFNSLSGNSPVLNSTISHLZ                   | -----                                       |                                         |       |     |     |     |     |     |  |  |
| XP_001682394.1 | ----- | NCWFNRNLSFDRV-NSTACTPZ                   | -----                                       |                                         |       |     |     |     |     |     |  |  |
| NP_848862.1    | ----- | NSYLEKVFY                                | -----                                       |                                         |       |     |     |     |     |     |  |  |
| EDL85374.1     | ----- | NSYLEKVFY                                | -----                                       |                                         |       |     |     |     |     |     |  |  |
| OCT81467.1     | ----- | NAYLEKVFY                                | -----                                       |                                         |       |     |     |     |     |     |  |  |
| XP_002122023.1 | ----- | NEYWKRLK                                 | -----                                       |                                         |       |     |     |     |     |     |  |  |
| XP_005443605.1 | ----- | NSYLEKVFY                                | -----                                       |                                         |       |     |     |     |     |     |  |  |
| XP_024182616.1 | ----- | NIKLEKLFLSDTIZ                           | -----                                       |                                         |       |     |     |     |     |     |  |  |
| XP_024165881.1 | ----- | SEWSDEIL                                 | ---VFGKEGAKSDGCGLEGMCICSEDRHCS              | PGKGYFCKPGVYEEARVCRYSPSSNVESDSPKTDLZ    | ----- |     |     |     |     |     |  |  |
| XP_008240731.1 | ----- | NNKLEKLFLSDTIZ                           | -----                                       |                                         |       |     |     |     |     |     |  |  |
| XP_008220057.1 | ----- | SEWSDEV                                  | ---VFGKEGVKGDGCALEGQCICSEDRHCS              | PGKGYFCKPGLVYQEARVCRYSSSPSPFVSGSGDKNDLZ | ----- |     |     |     |     |     |  |  |
| XP_004291192.1 | ----- | SEWSDEV                                  | ---VYGKEGGKSDGCGLEGMCICSEDRHCS              | PGKGYFCKPGLVYQEARVCRYSTSSNVASDNPKPTDZ   | ----- |     |     |     |     |     |  |  |
| XP_004303609.1 | ----- | NVLEKLFLPSSDTIZ                          | -----                                       |                                         |       |     |     |     |     |     |  |  |
| NP_190376.1    | ----- | NNMVEKLFPVSTTAZ                          | -----                                       |                                         |       |     |     |     |     |     |  |  |
| NP_182199.1    | ----- | SEWTDQILGKGNVTI                          | IKDGALEGLCVCSDDAHCAPTKGYFCRPGKVYKEARVCTRADD | ---ISVIQSLSYZ                           | ----- |     |     |     |     |     |  |  |
| NP_564393.1    | ----- | TEWNTQILGLKGNVTI                         | IKDGALEGLCVCSDDAHCAPTKGYFCRPGKVYKEARVCTRADD | ---ISVIQSLSYZ                           | ----- |     |     |     |     |     |  |  |
| NP_182198.2    | ----- | SEWTDQILGKGNVTI                          | IKDGALEGLCVCSDDAHCAPTKGYFCRPGKVYKEARVCTRADD | ---ISVIQSLSYZ                           | ----- |     |     |     |     |     |  |  |
| NP_182197.1    | ----- | SEWTDQILGKGNVTI                          | IKDGALEGLCVCSDDAHCAPTKGYFCRPGKVYKEARVCTRADD | ---ISVIQSLSYZ                           | ----- |     |     |     |     |     |  |  |
| NP_200460.1    | ----- | TEWNTQILGKGNVTI                          | IKDGALEGLCVCSDDAHCAPTKGYFCRPGKVYKEARVCTRADD | ---ISVIQSLSYZ                           | ----- |     |     |     |     |     |  |  |
| XP_023896433.1 | ----- | SEWTDQVLGLKNSVTI                         | IKDGALEGLCVCSDDAHCAPTKGYFCRPGKVYKEARVCTRADD | ---ISVIQSLSYZ                           | ----- |     |     |     |     |     |  |  |
| XP_023896434.1 | ----- | SEWTDQVLGLKNSVTI                         | IKDGALEGLCVCSDDAHCAPTKGYFCRPGKVYKEARVCTRADD | ---ISVIQSLSYZ                           | ----- |     |     |     |     |     |  |  |
| XP_023900169.1 | ----- | NNKLEKLFLPSSDTIZ                         | -----                                       |                                         |       |     |     |     |     |     |  |  |
| XP_023914113.1 | ----- | SEWSDEIL                                 | ---FGKEAANKGDGCALEGQCMCSEDRHCS              | PENGYFCKQGLVYKEARVCRYSQSLSGNEIFYGIRYZ   | ----- |     |     |     |     |     |  |  |
| XP_043131130.1 | ----- | NDFLVQQLGITRCSGYLSMZ                     | -----                                       |                                         |       |     |     |     |     |     |  |  |
| XP_002422445.1 | ----- | LSGKVWAERNGILLDZ                         | -----                                       |                                         |       |     |     |     |     |     |  |  |
| NP_013624.1    | ----- | INGIIDPSELSDZ                            | -----                                       |                                         |       |     |     |     |     |     |  |  |
| XP_003651626.1 | ----- | GPWHRRYLLGERSAGEGGEMERLPLEEVGFTTREPAGGGZ | -----                                       |                                         |       |     |     |     |     |     |  |  |
| XP_049145240.1 | ----- | KSVVGEAIGVYZ                             | -----                                       |                                         |       |     |     |     |     |     |  |  |
| NP_055577.1    | ----- | PEVYDKICKAARHZ                           | -----                                       |                                         |       |     |     |     |     |     |  |  |
| XP_004926865.1 | ----- | PEIYDKVNNVRKZ                            | -----                                       |                                         |       |     |     |     |     |     |  |  |

Figure S1
